# Supplementary material for: “It’s like these CHCs don’t exist, are they featured anywhere?”: Social network analysis of community health committees in a rural and urban setting in Kenya
Source: PLoS One. 2019 Aug 8;14(8):e0220836. doi: 10.1371/journal.pone.0220836 (PMC6687128; doi:10.1371/journal.pone.0220836)
Supplement: S1 File — (XLSX) [file pone.0220836.s001.xlsx]

## Sheet: Sheet1
	CHC	CHV	CHEW	Nurse in-Charge of Health Center	Local Chief	Sub County CHS Coordinator	Sub County HMT	Kajiado County HMT	Community Policing Committee	Traditional Birth Attendants Group	HIV Positive Mothers PMTCT Group	HIV Positive Support Group
CHC	0	1	1	0	1	0	0	0	1	0	0	0
CHV	1	0	1	1	1	0	0	0	1	1	1	1
CHEW	1	1	0	1	1	1	1	0	1	1	1	1
Nurse in-Charge of Health Center	0	1	1	0	0	0	1	0	0	0	0	0
Local Chief	1	1	1	0	0	0	1	0	1	0	0	0
Sub County CHS Coordinator	0	1	1	0	1	0	1	1	0	0	0	0
Sub County HMT	0	1	0	1	0	1	0	1	0	0	0	0
Kajiado County HMT	0	0	0	0	0	1	1	0	0	0	0	0
Community Policing Committee	1	1	1	0	1	0	0	0	0	0	0	0
Traditional Birth Attendants Group	0	1	1	1	0	0	0	0	0	0	0	0
HIV Positive Mothers PMTCT Group	0	1	1	1	0	0	0	0	0	0	0	0
HIV Positive Support Group	0	1	1	1	0	0	0	0	0	0	0	0
